# Supplementary material for: Electrospinning Chitosan/Fe-Mn Nanofibrous Composite for Efficient and Rapid Removal of Arsenite from Water
Source: MDPI journal article supplement (doi:10.3390/toxics12030230), 2024-03-21
Supplement: s1 [file s1]

# **Electrospinning Chitosan/Fe-Mn Nanofibrous Composite for Efficient and Rapid Removal of Arsenite from Water**

**Lingli Min <sup>1</sup>, Yahui Ma <sup>1</sup>, Bi Zhang <sup>1</sup>, Dulan He <sup>1</sup>, Jinhua Chen <sup>1</sup>, Xuerong Li <sup>1</sup>, Shuhua Wang <sup>1</sup>  
and Yulang Chi <sup>2,\*</sup>**

<sup>1</sup> College of Resources and Environmental Science, Quanzhou Normal University,  
Quanzhou 362000, China

<sup>2</sup> College of Oceanology and Food Science, Quanzhou Normal University,  
Quanzhou 362000, China

---

\* Corresponding author. College of Oceanology and Food Science, Quanzhou Normal University,  
398 Donghai Road, Quanzhou 362000, China

*E-mail address:* ylchi@qztc.edu.cn (Y. Chi).

## Supplementary data

**Table S1.** Concentration of the dissolved ions in the natural groundwater sample. (Unit: mg/L)

| As      | Fe              | Cu                            | Zn                           | Cr                            | Pb             |
|---------|-----------------|-------------------------------|------------------------------|-------------------------------|----------------|
| 0.00035 | 0.00112         | 0.00012                       | 0.00186                      | 0.00011                       | 0.00033        |
| F       | Cl <sup>-</sup> | SO <sub>4</sub> <sup>2-</sup> | NO <sub>3</sub> <sup>-</sup> | PO <sub>4</sub> <sup>3-</sup> | F <sup>-</sup> |
| 0.517   | 53.4            | 69.5                          | 12.1                         | 0.065                         | 0.517          |

**Table S2.** Binding energies and relative contents of C and O in the fresh and As(III)-loaded biosorbent.

| Valence state | Sample      | Assignment       | Binding energy (eV) | Relative Content (%) |
|---------------|-------------|------------------|---------------------|----------------------|
| C 1s          | Fe-Mn@CS    | C–C/C–H          | 284.8               | 26.9%                |
|               |             | C–O/C–N          | 286.4               | 57.6%                |
|               |             | C=O/O–C–O        | 288.0               | 15.5%                |
|               | Fe-Mn@CS-As | C–C/C–H          | 284.8               | 28.8%                |
|               |             | C–O/C–N          | 286.3               | 51.3%                |
|               |             | C=O/O–C–O        | 287.8               | 19.9%                |
| O 1s          | Fe-Mn@CS    | M–O              | 529.7               | 5.3%                 |
|               |             | –OH              | 532.4               | 46.0%                |
|               |             | H <sub>2</sub> O | 532.8               | 48.7%                |
|               | Fe-Mn@CS-As | M–O              | 530.0               | 6.3%                 |
|               |             | –OH              | 532.2               | 37.8%                |
|               |             | H <sub>2</sub> O | 532.7               | 55.9%                |
